# Supplementary material for: Boosting plasmon-enhanced electrochemistry by in situ surface cleaning of plasmonic nanocatalysts
Source: Royal Society of Chemistry journal article supplement (doi:10.1039/d3nr04606k), 2023-01-01
Supplement: d3nr04606k1.pdf [file d3nr04606k1.pdf]

## Supporting Information

### **Boosting Plasmon-Enhanced Electrochemistry by In-Situ Surface Cleaning of Plasmonic Nanocatalysts**

Yu Wang,<sup>a,b</sup> Xueqing Sang,<sup>a,b</sup> Fengxia Wu,<sup>b</sup> Yuanhao Pang,<sup>a</sup> Guobao Xu,<sup>b</sup> Yali Yuan,<sup>\*a</sup>

Hsien-Yi Hsu<sup>c</sup> and Wenxin Niu<sup>\*b</sup>

*<sup>a</sup>Guangxi Key Laboratory of Electrochemical and Magneto-chemical Functional  
Materials, College of chemistry and bioengineering, Guilin University of Technology,  
Guilin 541006, China.*

*<sup>b</sup>State Key Laboratory of Electrochemical Chemistry, Changchun Institute of Applied  
Chemistry, Chinese Academy of Sciences, 5625 Renmin Street, Changchun, Jilin  
130022, China.*

*<sup>c</sup>School of Energy and Environment, Department of Materials Science and  
Engineering, City University of Hong Kong, Kowloon Tong, Hong Kong 999077,  
China.*

*Email: [thanksin2013@163.com](mailto:thanksin2013@163.com); [niuwx@ciac.ac.cn](mailto:niuwx@ciac.ac.cn)*

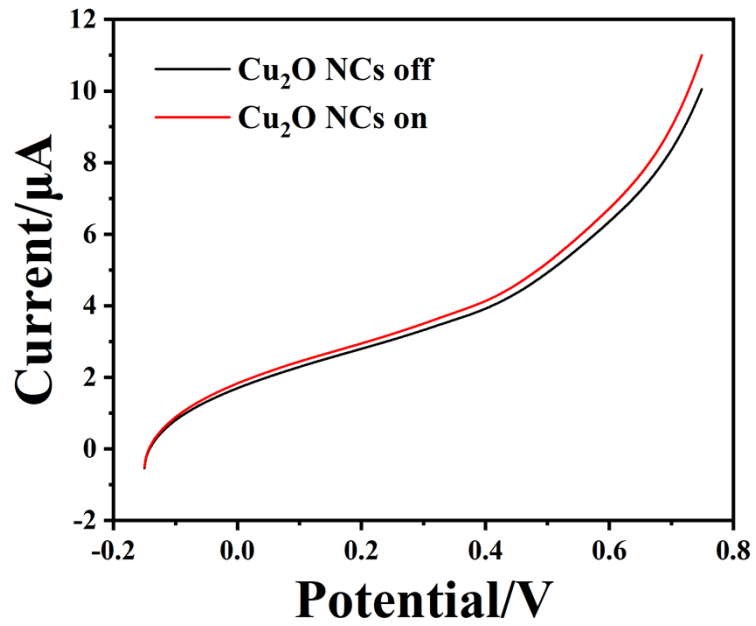

**Figure S1.** Forward scan curves of CVs for 50 mM glucose oxidation (in 0.1 M NaOH) on the Cu<sub>2</sub>O NCs/GC with and without LSPR excitation.

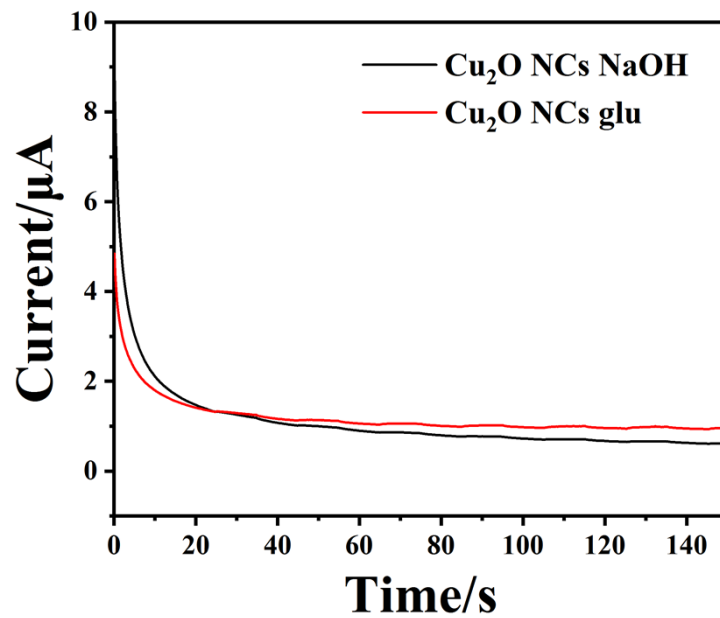

**Figure S2.** I-t curves at 0.3 V with plasmonic excitation on and off in the presence and absence of 50 mM glucose at the Cu<sub>2</sub>O NCs/GC.
